# Supplementary material for: Impact of open crop residual burning on air quality over Central Eastern China during the Mount Tai Experiment 2006 (MTX2006)
Source: Copernicus journal article supplement (doi:10.5194/acp-10-7353-2010), 2010-08-09
Supplement: Supplementary file 1 [file acp-10-7353-2010-supplement.pdf]

Emissions from OCRB in Chinese provinces (Gg species yr-1)

|             | 2006            |                 |       |                 |    |     |      | 2000            |                 |       |                 |    |     |      |
|-------------|-----------------|-----------------|-------|-----------------|----|-----|------|-----------------|-----------------|-------|-----------------|----|-----|------|
|             | NO <sub>x</sub> | SO <sub>2</sub> | CO    | NH <sub>3</sub> | EC | OC  | VOC  | NO <sub>x</sub> | SO <sub>2</sub> | CO    | NH <sub>3</sub> | EC | OC  | VOC  |
| Anhui       | 36              | 4               | 873   | 12              | 7  | 31  | 149  | 31              | 3               | 742   | 10              | 6  | 27  | 127  |
| Beijing     | 1               | 0               | 29    | 0               | 0  | 1   | 5    | 1               | 0               | 33    | 0               | 0  | 1   | 6    |
| Fujian      | 6               | 1               | 146   | 2               | 1  | 5   | 25   | 7               | 1               | 174   | 2               | 1  | 6   | 30   |
| Gansu       | 7               | 1               | 160   | 2               | 1  | 6   | 27   | 6               | 1               | 145   | 2               | 1  | 5   | 25   |
| Guangdong   | 12              | 1               | 299   | 4               | 2  | 11  | 51   | 15              | 2               | 365   | 5               | 3  | 13  | 62   |
| Guangxi     | 23              | 2               | 549   | 8               | 4  | 20  | 94   | 20              | 2               | 487   | 7               | 4  | 17  | 83   |
| Guizhou     | 16              | 2               | 377   | 5               | 3  | 14  | 64   | 16              | 2               | 379   | 5               | 3  | 14  | 65   |
| Hainan      | 2               | 0               | 51    | 1               | 0  | 2   | 9    | 3               | 0               | 61    | 1               | 0  | 2   | 10   |
| Hebei       | 36              | 4               | 856   | 12              | 6  | 31  | 146  | 32              | 3               | 757   | 11              | 6  | 27  | 129  |
| Helongjiang | 31              | 3               | 744   | 11              | 6  | 27  | 127  | 23              | 2               | 549   | 8               | 4  | 20  | 94   |
| Henan       | 53              | 6               | 1269  | 18              | 10 | 46  | 217  | 41              | 4               | 991   | 14              | 7  | 36  | 169  |
| Hubei       | 16              | 2               | 393   | 6               | 3  | 14  | 67   | 16              | 2               | 388   | 5               | 3  | 14  | 66   |
| Hunan       | 29              | 3               | 705   | 10              | 5  | 25  | 120  | 29              | 3               | 706   | 10              | 5  | 25  | 120  |
| Jiangsu     | 29              | 3               | 698   | 10              | 5  | 25  | 119  | 30              | 3               | 714   | 10              | 5  | 26  | 122  |
| Jiangxi     | 12              | 1               | 292   | 4               | 2  | 10  | 50   | 11              | 1               | 261   | 4               | 2  | 9   | 45   |
| Jilin       | 28              | 3               | 683   | 10              | 5  | 25  | 117  | 16              | 2               | 384   | 5               | 3  | 14  | 66   |
| Liaoning    | 17              | 2               | 413   | 6               | 3  | 15  | 70   | 10              | 1               | 246   | 3               | 2  | 9   | 42   |
| Neimong     | 19              | 2               | 445   | 6               | 3  | 16  | 76   | 13              | 1               | 305   | 4               | 2  | 11  | 52   |
| Ningxia     | 3               | 0               | 83    | 1               | 1  | 3   | 14   | 3               | 0               | 64    | 1               | 0  | 2   | 11   |
| Qinghai     | 1               | 0               | 23    | 0               | 0  | 1   | 4    | 1               | 0               | 19    | 0               | 0  | 1   | 3    |
| Shaanxi     | 12              | 1               | 296   | 4               | 2  | 11  | 50   | 12              | 1               | 282   | 4               | 2  | 10  | 48   |
| Shandong    | 49              | 5               | 1167  | 16              | 9  | 42  | 199  | 45              | 5               | 1077  | 15              | 8  | 39  | 184  |
| Shanghai    | 1               | 0               | 24    | 0               | 0  | 1   | 4    | 2               | 0               | 45    | 1               | 0  | 2   | 8    |
| Shanxi      | 12              | 1               | 285   | 4               | 2  | 10  | 49   | 8               | 1               | 197   | 3               | 1  | 7   | 34   |
| Sichuan     | 30              | 3               | 718   | 10              | 5  | 26  | 123  | 33              | 3               | 796   | 11              | 6  | 29  | 136  |
| Tianjin     | 2               | 0               | 40    | 1               | 0  | 1   | 7    | 1               | 0               | 31    | 0               | 0  | 1   | 5    |
| Xingjiang   | 12              | 1               | 288   | 4               | 2  | 10  | 49   | 10              | 1               | 230   | 3               | 2  | 8   | 39   |
| Xizhang     | 1               | 0               | 14    | 0               | 0  | 1   | 2    | 1               | 0               | 15    | 0               | 0  | 1   | 3    |
| Yunnan      | 22              | 2               | 530   | 7               | 4  | 19  | 90   | 21              | 2               | 496   | 7               | 4  | 18  | 85   |
| Zhejiang    | 9               | 1               | 222   | 3               | 2  | 8   | 38   | 12              | 1               | 292   | 4               | 2  | 10  | 50   |
| China total | 528             | 55              | 12673 | 179             | 95 | 455 | 2163 | 468             | 49              | 11231 | 159             | 84 | 403 | 1917 |
